# Supplementary material for: Polymeric platform for the growth of chemically anchored ZnO nanostructures by ALD
Source: Royal Society of Chemistry journal article supplement (doi:10.1039/c7ra11168a), 2018-01-01
Supplement: c7ra11168a1.pdf [file c7ra11168a1.pdf]

ELECTRONIC SUPPLEMENTARY INFORMATION

**Polymeric platform for the growth of chemically anchored ZnO nanostructures by ALD**

Giovanna Pellegrino,<sup>a\*</sup> Sabrina Carola Carroccio,<sup>a,b</sup> Francesco Ruffino,<sup>a,c</sup> Guglielmo G. Condorelli,<sup>d</sup> Giuseppe Nicotra<sup>e</sup>, Vittorio Privitera<sup>a</sup> and Giuliana Impellizzeri<sup>a</sup>

<sup>a.</sup> CNR-IMM, Via S. Sofia 64, 95123 Catania, Italy.

<sup>b.</sup> CNR-IPCB, Via P. Gaifami 18, 95126 Catania, Italy.

<sup>c.</sup> Dipartimento di Fisica e Astronomia, Università di Catania, Via S. Sofia 64, 95123 Catania, Italy

<sup>d.</sup> Dipartimento Scienze Chimiche, Università di Catania and INSTM UdR Catania, V.le A. Doria 6, 95125 Catania, Italy

<sup>e.</sup> CNR-IMM, Z.I. VIII Strada 5, 95121 Catania, Italy

\*Corresponding author: [giovanna.pellegrino@imm.cnr.it](mailto:giovanna.pellegrino@imm.cnr.it)

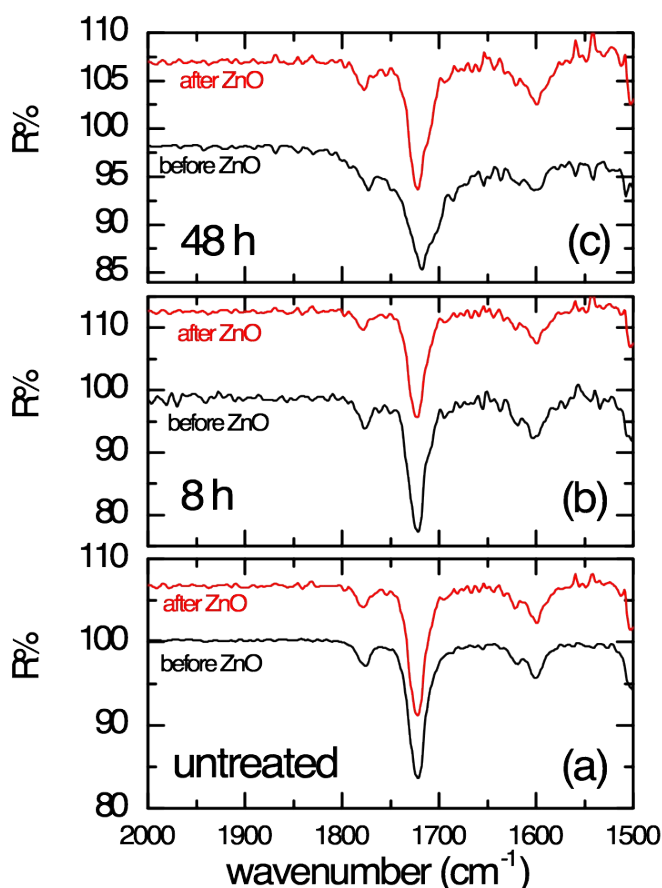

Fig E1: FTIR-ATR spectra related to (a) untreated, (b) 8h- and (c) 48h-treated ULTEM<sup>®</sup> 1000 films before (black line) and after (red line) ZnO ALD deposition.

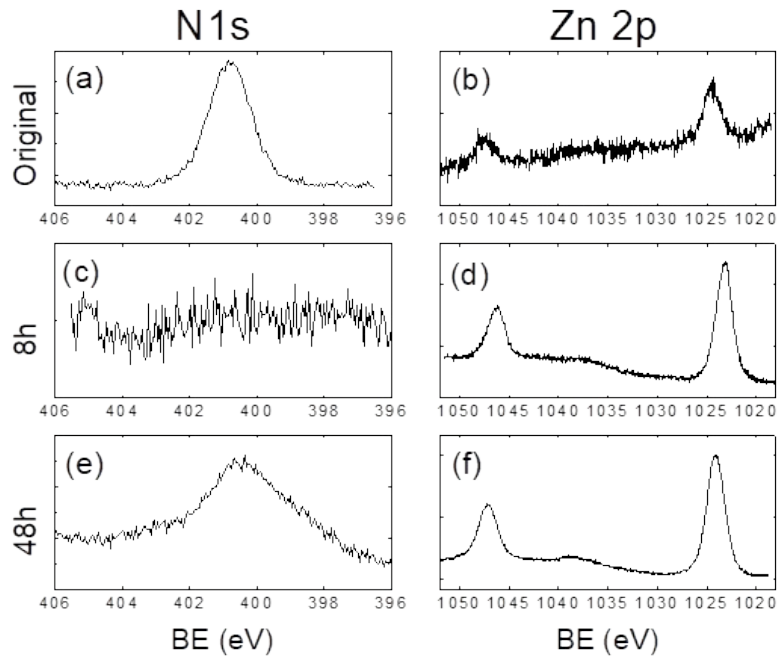

Fig E2: XPS spectra related to N1s and Zn 2p regions of (a) and (b) untreated; (c) and (d) 8h-; (e) and (f) 48h-treated ULTEM® 1000 films after ZnO ALD deposition.
